# Supplementary material
Source: Royal Society of Chemistry journal article supplement (doi:10.1039/d6ce00233a)
Supplement: d6ce00233a1.pdf [file d6ce00233a1.pdf]

## Novel hydroxyl-functionalized 1,2,4-triazole-based oligomers: synthetic approach, photoluminescence and coordination behaviour as uranyl chelators

Dmytro M. Khomenko,<sup>a,b</sup> Oleksandr V. Vashchenko,<sup>a</sup> Roman O. Doroshchuk,<sup>a,b</sup> Viktoriia S. Starova,<sup>a</sup> Mariia Hreben,<sup>a,c</sup> Valerii Bukhanko,<sup>a</sup> Andrii V. Yatsymyrskyi,<sup>a</sup> Sergiu Shova,<sup>d</sup> Olga Yu. Vassilyeva<sup>a\*</sup> and Rostyslav D. Lampeka<sup>a</sup>

<sup>a</sup> Department of Chemistry, Taras Shevchenko National University of Kyiv, 12 Hetman Pavlo Skoropadskyi St., Kyiv 01601, Ukraine.

<sup>b</sup> Enamine Ltd, 78 Winston Churchill St., Kyiv 02094, Ukraine.

<sup>c</sup> L.I. Medved's Research Center of Preventive Toxicology, Food and Chemical Safety, Ministry of Health, Ukraine (State Enterprise), 6 Heroiv Oborony St., Kyiv 03127, Ukraine

<sup>d</sup> "PetruPoni" Institute of Macromolecular Chemistry, Aleea Gr. GhicaVoda 41 A, Iasi 700487, Romania.

### Supplementary information

|            |                                                                                                                                                                                                                                                                                                     |       |
|------------|-----------------------------------------------------------------------------------------------------------------------------------------------------------------------------------------------------------------------------------------------------------------------------------------------------|-------|
| Fig. S1    | <sup>1</sup> H NMR spectra of initial 1,2,4-triazole containing acetic acid ethyl ester and hydrazides <b>E2</b> (a), <b>H2</b> (b) and <b>H3</b> (c) in DMSO- <i>d</i> <sub>6</sub>                                                                                                                | 2–3   |
| Fig. S2    | <sup>1</sup> H NMR spectra of <b>H<sub>2</sub>L<sup>2</sup></b> in DMSO- <i>d</i> <sub>6</sub> : (a) C = 21.5 mM, (b) C = 6.7 mM                                                                                                                                                                    | 3–4   |
| Fig. S3    | <sup>1</sup> H NMR spectrum of <b>H<sub>2</sub>L<sup>3</sup></b> in DMSO- <i>d</i> <sub>6</sub> , C = 21.4 mM                                                                                                                                                                                       | 4     |
| Fig. S4    | <sup>1</sup> H DOSY NMR spectra of <b>H<sub>2</sub>L<sup>1</sup></b> in DMSO- <i>d</i> <sub>6</sub> : (a) C = 33.02 mM; (b) C = 11.3 mM                                                                                                                                                             | 5     |
| Fig. S5    | <sup>1</sup> H DOSY NMR spectra of <b>H<sub>2</sub>L<sup>2</sup></b> in DMSO- <i>d</i> <sub>6</sub> : (a) C = 23.2 mM; (b) C = 6.8 mM                                                                                                                                                               | 5     |
| Fig. S6    | <sup>1</sup> H DOSY NMR spectra of <b>H<sub>2</sub>L<sup>3</sup></b> in DMSO- <i>d</i> <sub>6</sub> : (a) C = 21.4 mM; (b) C = 7.0 mM                                                                                                                                                               | 5     |
| Table S1   | Self-diffusion coefficients of <b>H<sub>2</sub>L<sup>1–3</sup></b> and complexes <b>1–3</b> calculated using the DOSY signals of the molecular framework                                                                                                                                            | 6     |
| Table S2   | Self-diffusion coefficients of labile protons in <b>H<sub>2</sub>L<sup>1–3</sup></b>                                                                                                                                                                                                                | 6     |
| Fig. S7    | <sup>1</sup> H NMR spectra of complexes <b>1</b> (a), [ <b>2–4DMF</b> ] (b) and <b>3</b> (c) in DMSO- <i>d</i> <sub>6</sub>                                                                                                                                                                         | 7–8   |
| Fig. S8    | <sup>1</sup> H DOSY NMR spectra of complexes in DMSO- <i>d</i> <sub>6</sub> : (a) <b>1</b> , C = 7.2 mM; (b) [ <b>2–4DMF</b> ], C = 6.1 mM and (c) <b>3</b> , C = 2.1 mM                                                                                                                            | 8     |
| Fig. S9    | IR spectra of <b>H<sub>2</sub>L<sup>1</sup></b> (a), <b>H<sub>2</sub>L<sup>2</sup></b> (b) and <b>H<sub>2</sub>L<sup>3</sup></b> (c) in KBr                                                                                                                                                         | 9–10  |
| Fig. S10   | IR spectra of complexes <b>1</b> (a), [ <b>2–4DMF</b> ] (b) and <b>3</b> (c) in KBr                                                                                                                                                                                                                 | 10–11 |
| Table S3   | Selected geometric parameters (Å, °) for <b>1</b> and <b>2</b>                                                                                                                                                                                                                                      | 12    |
| Fig. S11   | Fragment of molecule <b>A</b> of complex <b>2</b> showing a boat conformation of the six-membered metallacycle                                                                                                                                                                                      | 13    |
| Table S4   | Selected geometric parameters (Å, °) for <b>3</b>                                                                                                                                                                                                                                                   | 13    |
| Table S5   | Hydrogen-bond geometry (Å, °) for <b>1–3</b>                                                                                                                                                                                                                                                        | 14–15 |
| Fig. S12   | Absorption spectra of (a) <b>H<sub>2</sub>L<sup>1</sup></b> (red) and complex <b>1</b> (blue); (b) <b>H<sub>2</sub>L<sup>3</sup></b> (red) and complex <b>3</b> (blue) in DMSO at r.t. C <sub>Ligand</sub> = C <sub>Complex</sub> = 5 × 10 <sup>-5</sup> M                                          | 15    |
| Fig. S13   | Excitation (dotted) and emission spectra (solid) of ligands (blue) and their complexes (red) in DMSO at r.t.: (a) <b>H<sub>2</sub>L<sup>2</sup></b> and [ <b>2–4DMF</b> ]; (b) <b>H<sub>2</sub>L<sup>3</sup></b> and <b>3</b> . C <sub>Ligand</sub> = C <sub>Complex</sub> = 1 × 10 <sup>-5</sup> M | 16    |
| Listing S1 | Cartesian coordinates of the optimized molecular structures of <b>H<sub>2</sub>L<sup>1–3</sup></b> and complexes <b>1–3</b> in DMSO medium (SMD continuum solvation model)                                                                                                                          | 17–19 |

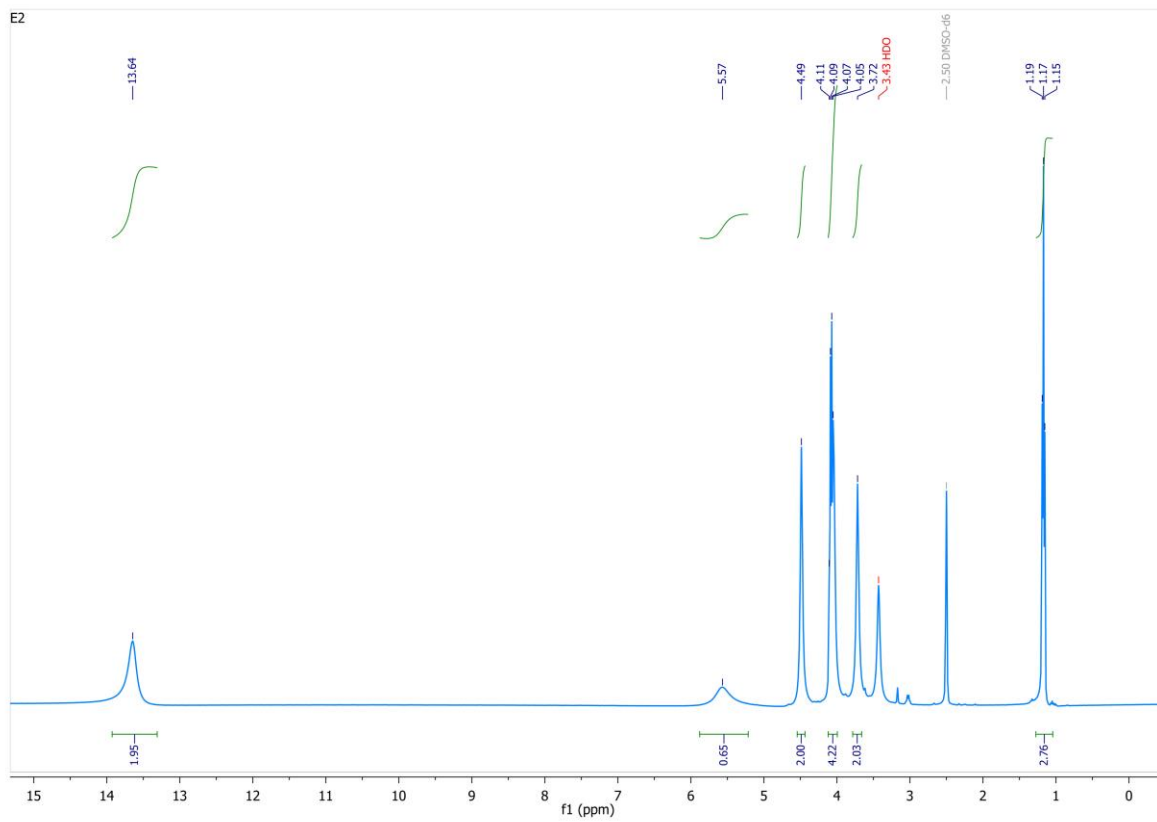

(a)

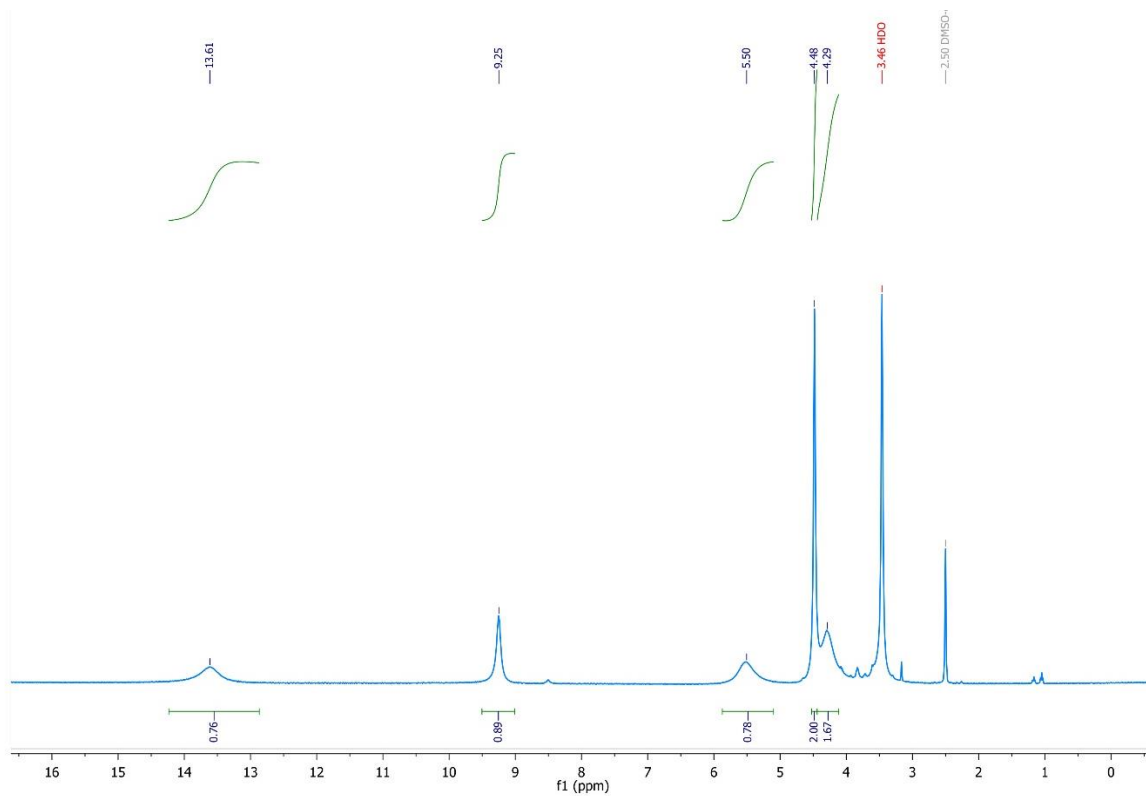

(b)

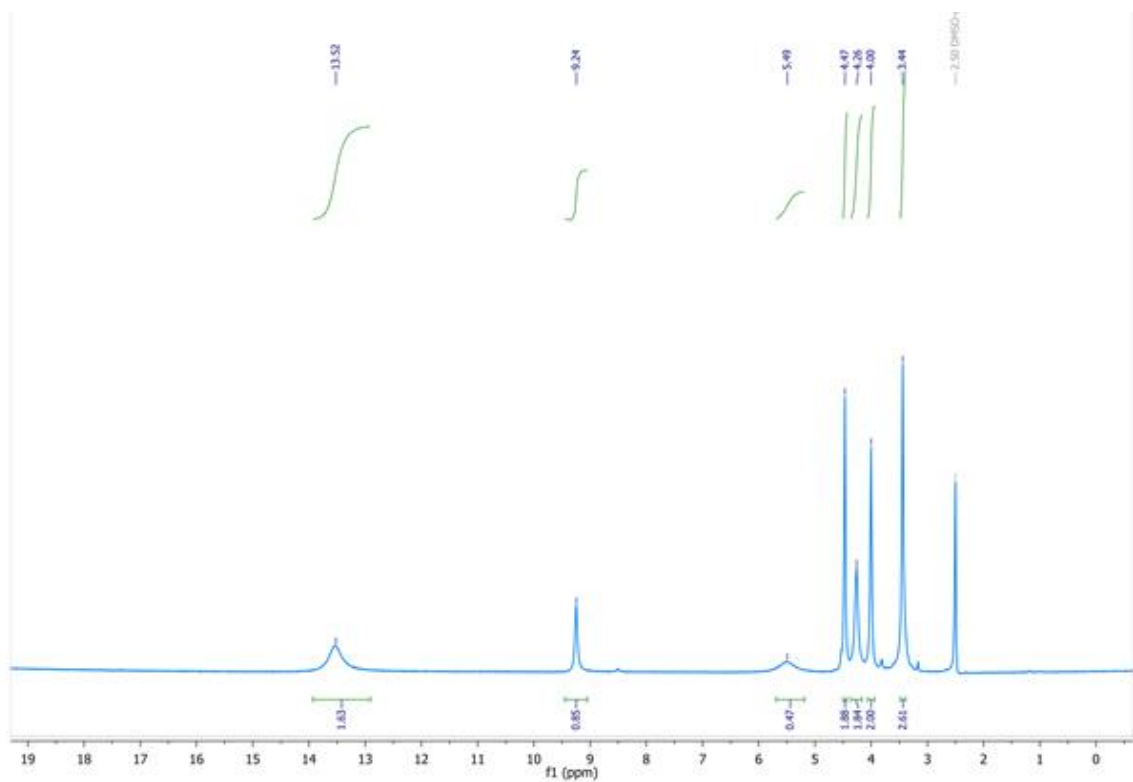

(c)

**Fig. S1.**  $^1\text{H}$  NMR spectra of initial 1,2,4-triazole containing acetic acid ethyl ester and hydrazides **E2** (a), **H2** (b) and **H3** (c) in  $\text{DMSO-}d_6$ .

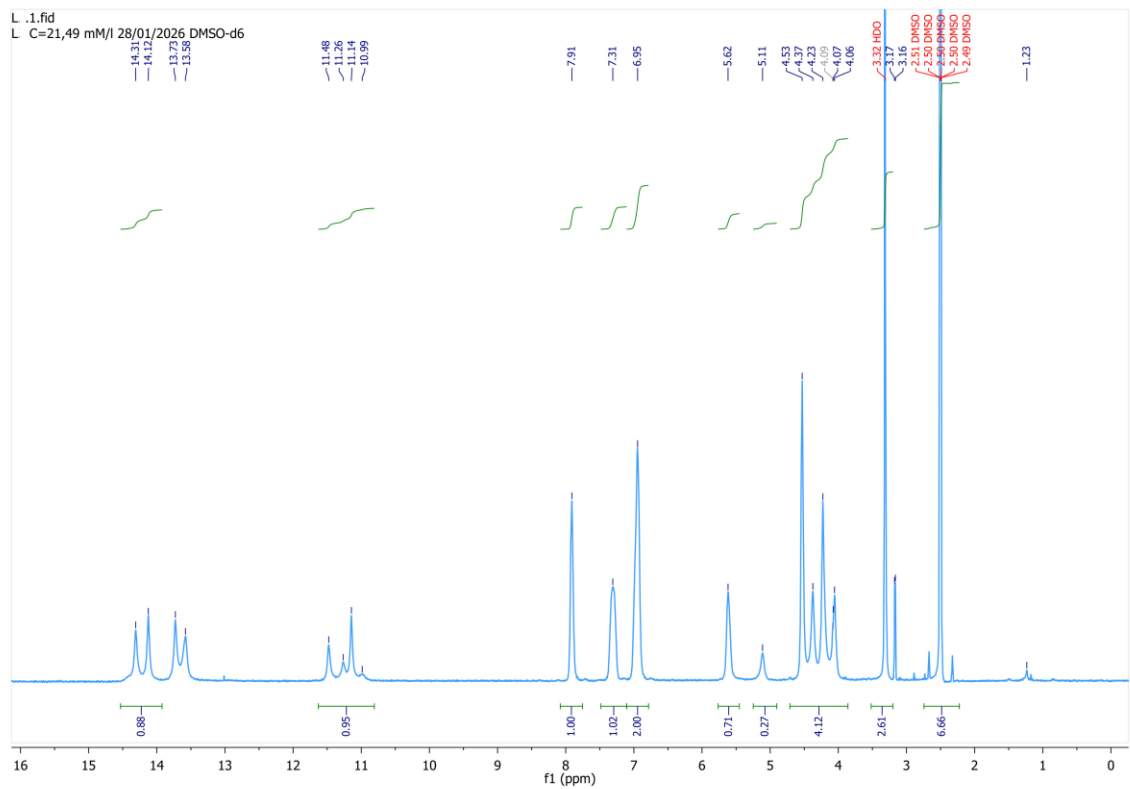

(a)

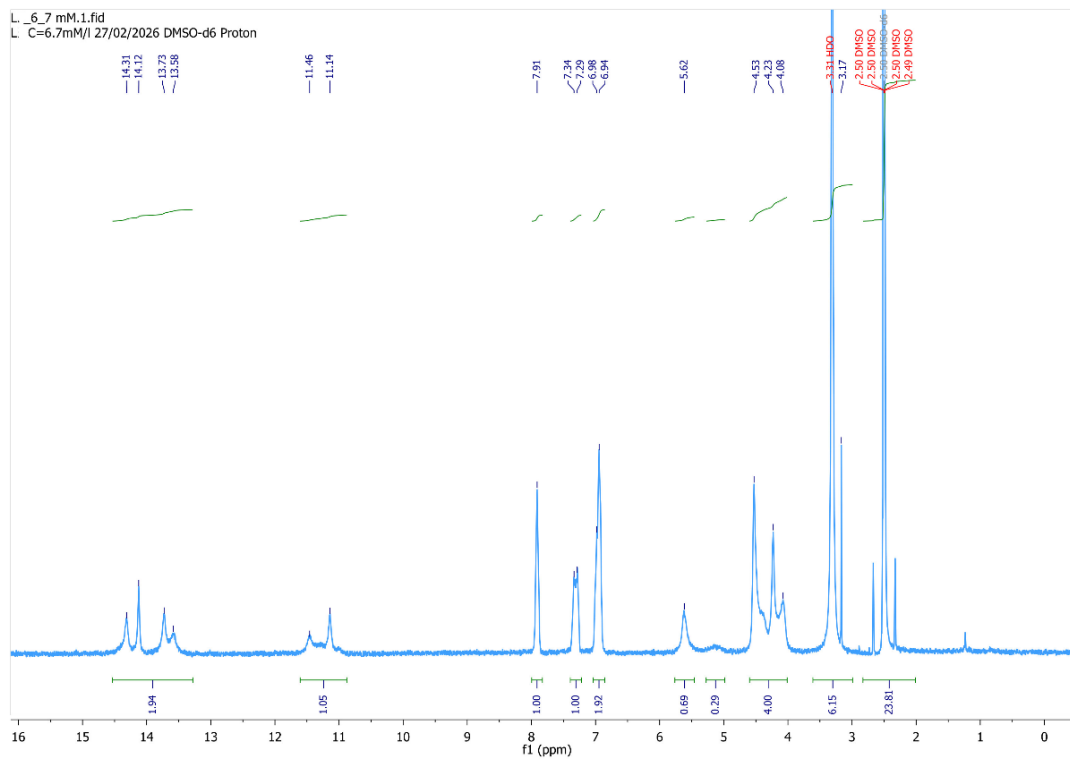

(b)

**Fig. S2.**  $^1\text{H}$  NMR spectra of  $\text{H}_2\text{L}^2$  in  $\text{DMSO-}d_6$ : (a)  $C = 21.5$  mM, (b)  $C = 6.7$  mM.

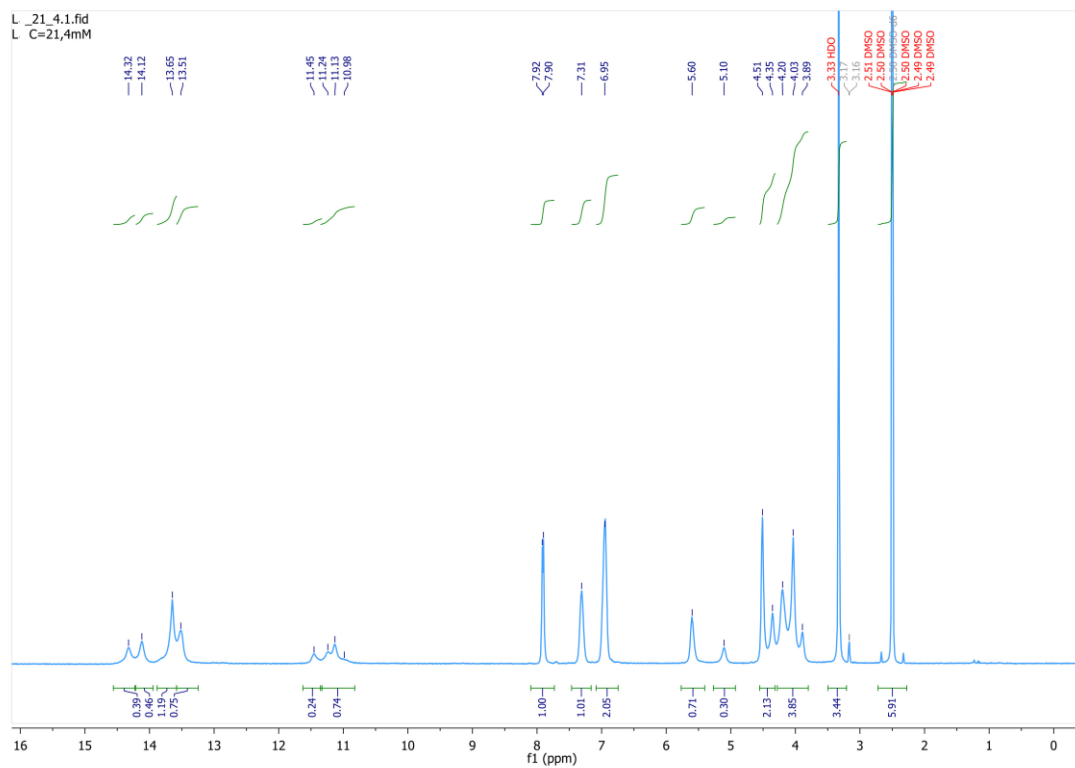

**Fig. S3.**  $^1\text{H}$  NMR spectrum of  $\text{H}_2\text{L}^3$  in  $\text{DMSO-}d_6$ ,  $C = 21.4$  mM.

*Comment: Due to the presence of fast exchange/tautomeric processes in solution, the nuclei of labile protons exhibit significantly shorter relaxation times. Consequently, they undergo stronger signal attenuation during the pulse sequence, resulting in DOSY signal intensities that are substantially lower (or absent altogether) than those of non-labile protons.*

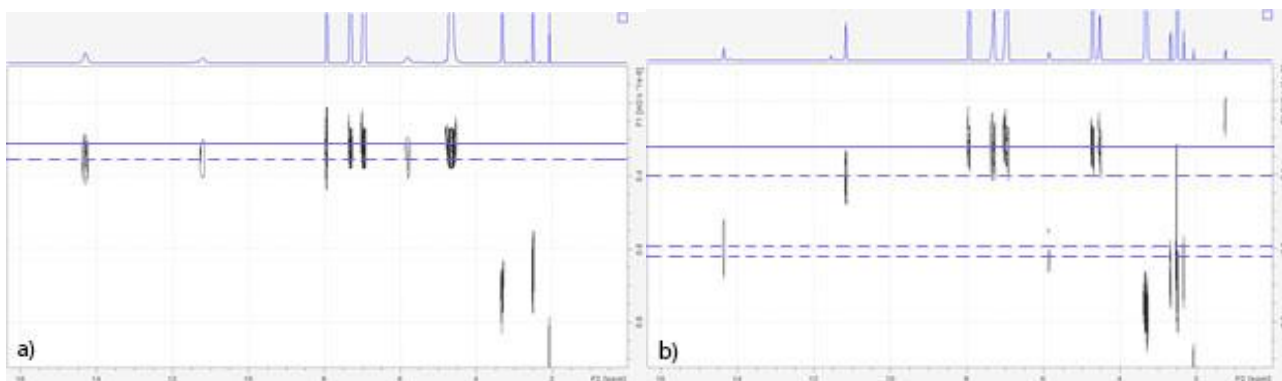

**Fig. S4.**  $^1\text{H}$  DOSY NMR spectra of  $\text{H}_2\text{L}^1$  in  $\text{DMSO-}d_6$ : (a)  $C = 33.02$  mM; (b)  $C = 11.3$  mM.

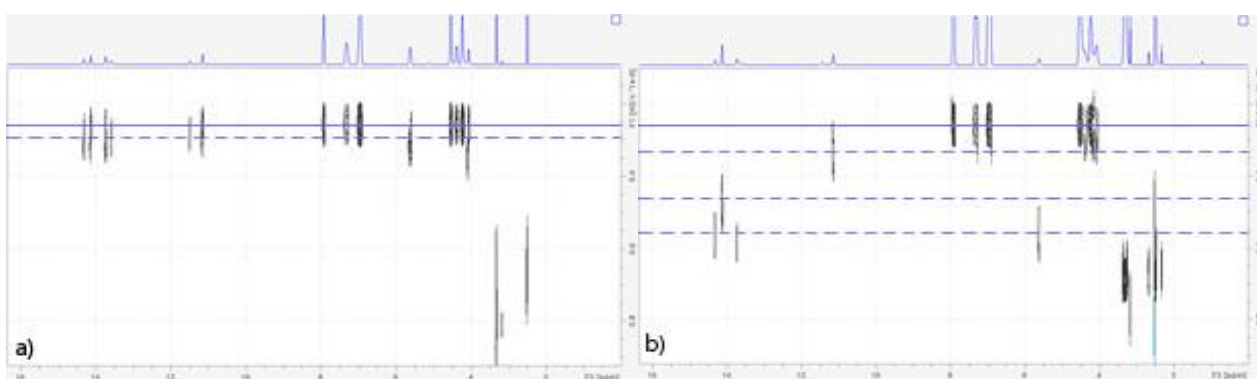

**Fig. S5.**  $^1\text{H}$  DOSY NMR spectra of  $\text{H}_2\text{L}^2$  in  $\text{DMSO-}d_6$ : (a)  $C = 23.2$  mM; (b)  $C = 6.8$  mM.

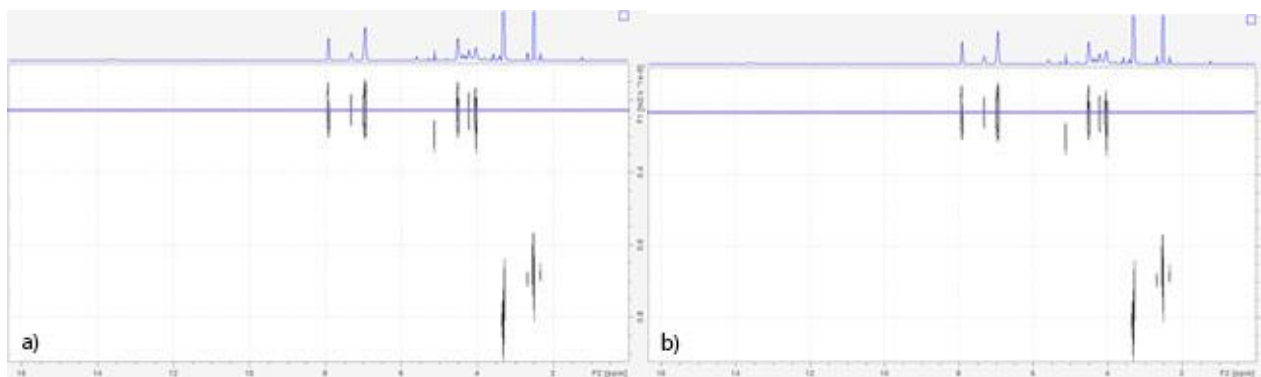

**Fig. S6.**  $^1\text{H}$  DOSY NMR spectra  $\text{H}_2\text{L}^3$  in  $\text{DMSO-}d_6$ : (a)  $C = 21.4$  mM; (b)  $C = 7.0$  mM.

**Table S1.** Self-diffusion coefficients of  $\text{H}_2\text{L}^{1-3}$  and complexes **1–3** calculated using the DOSY signals of the molecular framework

| Compound               | Concentration, mM | $D \times 10^{-10} \text{ m}^2\text{s}^{-1}$ |
|------------------------|-------------------|----------------------------------------------|
| $\text{H}_2\text{L}^1$ | 33.02             | 3.22                                         |
|                        | 11.3              | 3.22                                         |
| $\text{H}_2\text{L}^2$ | 23.2              | 2.56                                         |
|                        | 6.8               | 2.59                                         |
| $\text{H}_2\text{L}^3$ | 21.4              | 1.97                                         |
|                        | 7.0               | 2.19                                         |
| <b>1</b>               | 7.2               | 2.03                                         |
| [2–4DMF]               | 6.1               | 1.99                                         |
| <b>3</b>               | 2.1               | 2.20                                         |
| DMSO- $d_6$            |                   | 6.63*                                        |
| H <sub>2</sub> O       |                   | 7.78*                                        |

\* - independent on compound concentration

**Table S2.** Self-diffusion coefficients of labile protons in  $\text{H}_2\text{L}^{1-3}$ 

| Compound               | Concentration, mM | Group               | $D \times 10^{-10} \text{ m}^2\text{s}^{-1}$ |
|------------------------|-------------------|---------------------|----------------------------------------------|
| $\text{H}_2\text{L}^1$ | 33.02             | NH                  | 3.78                                         |
|                        |                   | Ph-OH               |                                              |
|                        |                   | CH <sub>2</sub> -OH |                                              |
| $\text{H}_2\text{L}^1$ | 11.3              | NH                  | 6.02                                         |
|                        |                   | Ph-OH               | 4.07                                         |
|                        |                   | CH <sub>2</sub> -OH | 6.09                                         |
| $\text{H}_2\text{L}^2$ | 23.2              | NH                  | 2.91                                         |
|                        |                   | Ph-OH               | 2.59                                         |
|                        |                   | CH <sub>2</sub> -OH | 3.15                                         |
| $\text{H}_2\text{L}^2$ | 6.8               | NH                  | 4.80                                         |
|                        |                   | Ph-OH               | 3.48                                         |
|                        |                   | CH <sub>2</sub> -OH | 5.36                                         |
| $\text{H}_2\text{L}^3$ | 21.4              | NH                  | 2.28                                         |
|                        |                   | Ph-OH               | 2.07                                         |
|                        |                   | CH <sub>2</sub> -OH | 2.42                                         |
| $\text{H}_2\text{L}^3$ | 7.0               | NH                  | 3.24                                         |
|                        |                   | Ph-OH               | 2.78                                         |
|                        |                   | CH <sub>2</sub> -OH | 3.01                                         |
| DMSO- $d_6$            |                   |                     | 6.63*                                        |
| H <sub>2</sub> O       |                   |                     | 7.78*                                        |

\* - independent on compound concentration

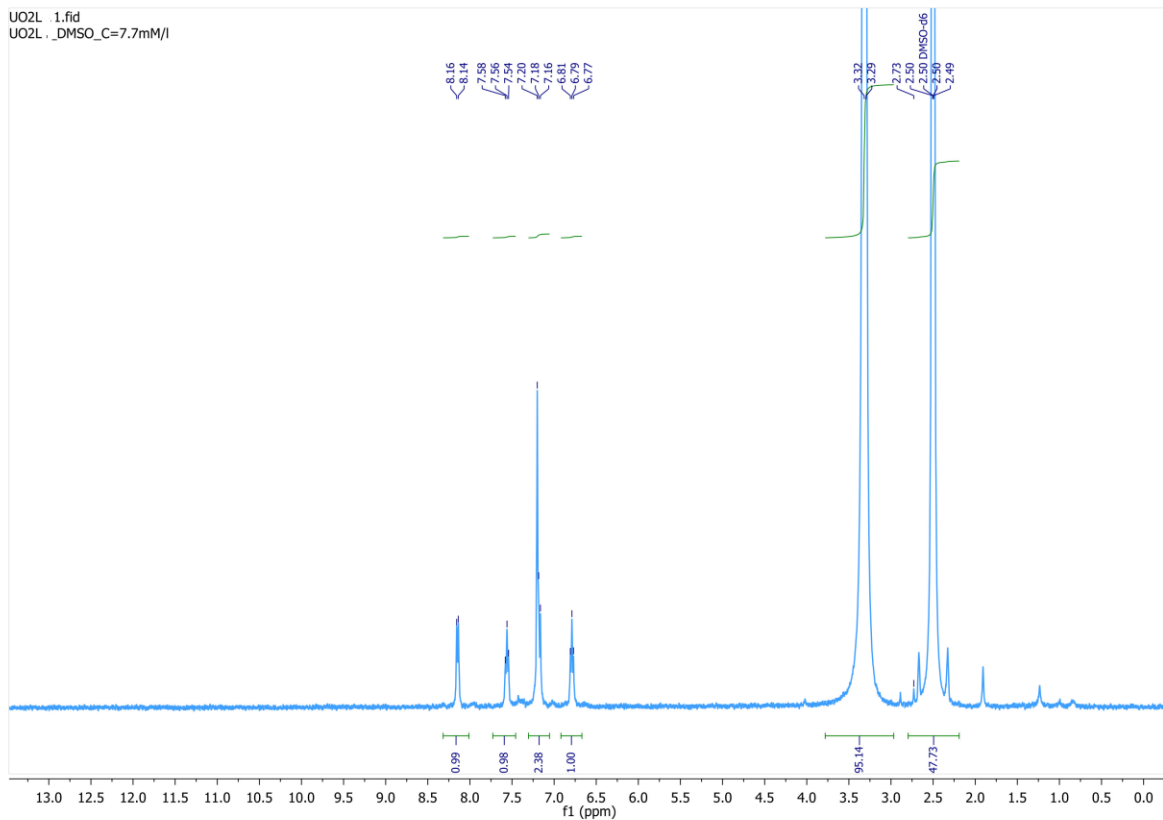

(a)

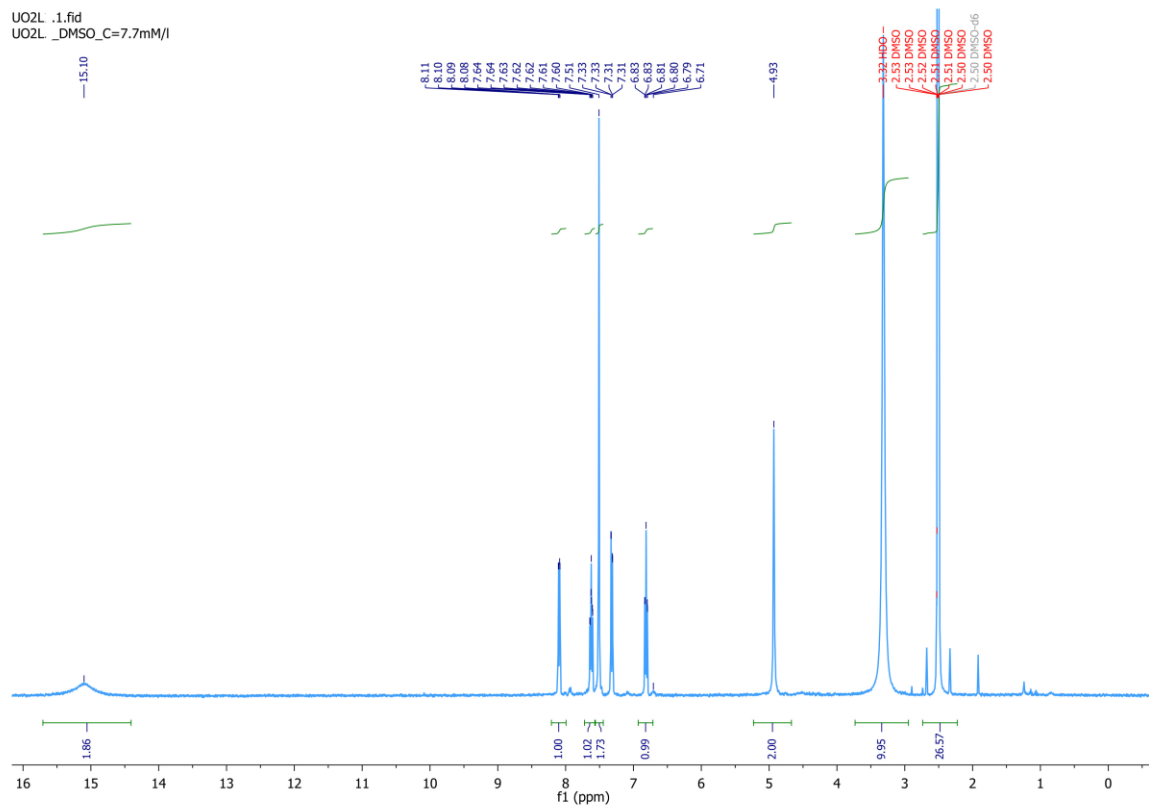

(b)

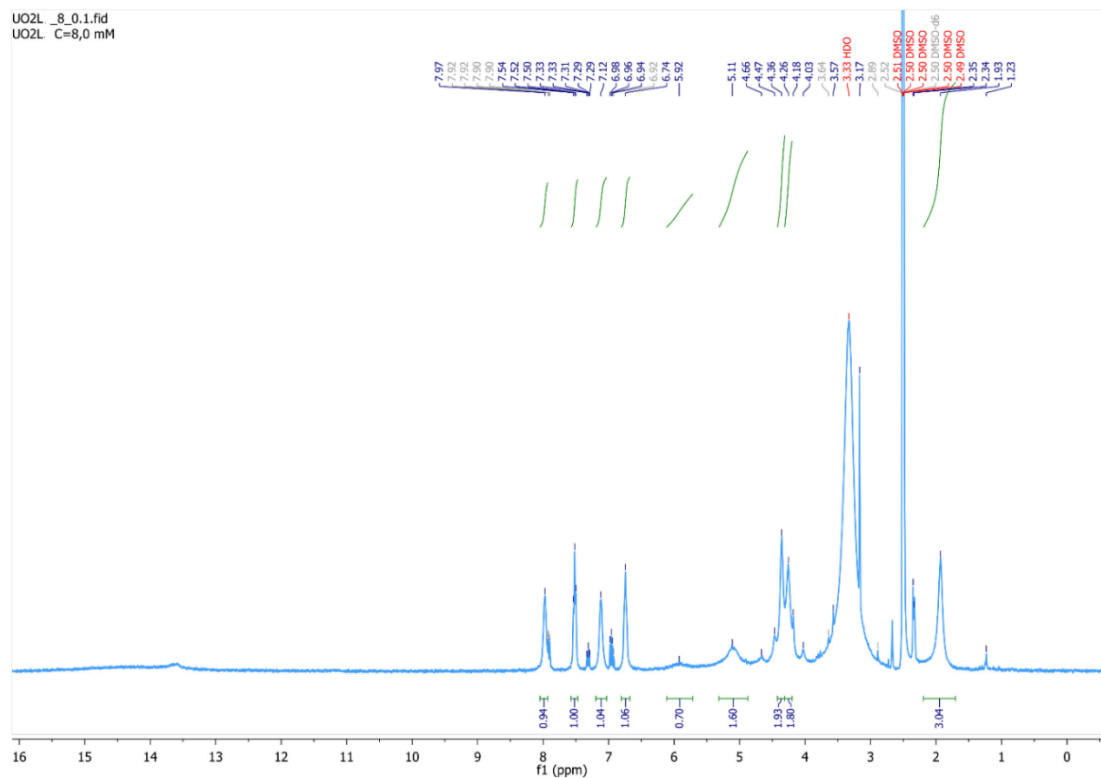

(c)

**Fig. S7.**  $^1\text{H}$  NMR spectra of complexes **1** (a), [**2**-4DMF] (b) and **3** (c) in  $\text{DMSO-}d_6$ .

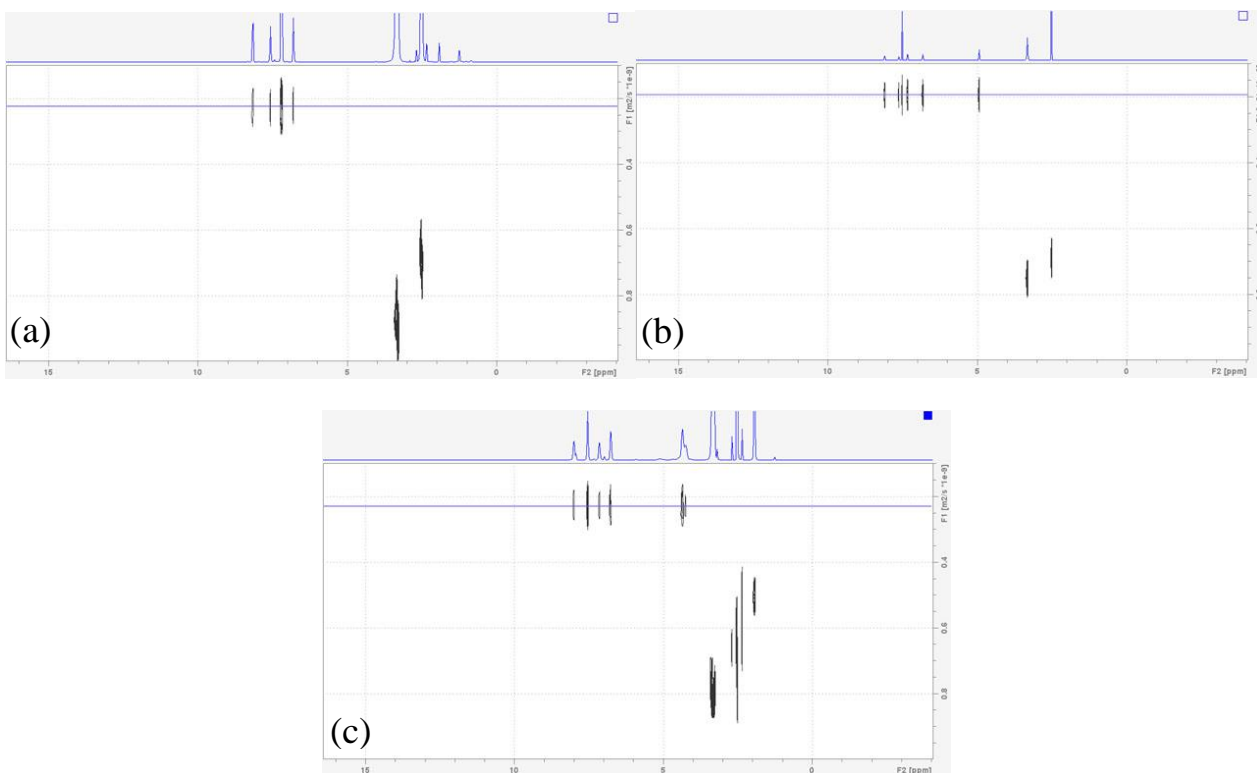

**Fig. S8.**  $^1\text{H}$  DOSY NMR spectra of complexes in  $\text{DMSO-}d_6$ : (a) **1**,  $C = 7.2$  mM; (b) [**2**-4DMF],  $C = 6.1$  mM and (c) **3**,  $C = 2.1$  mM.

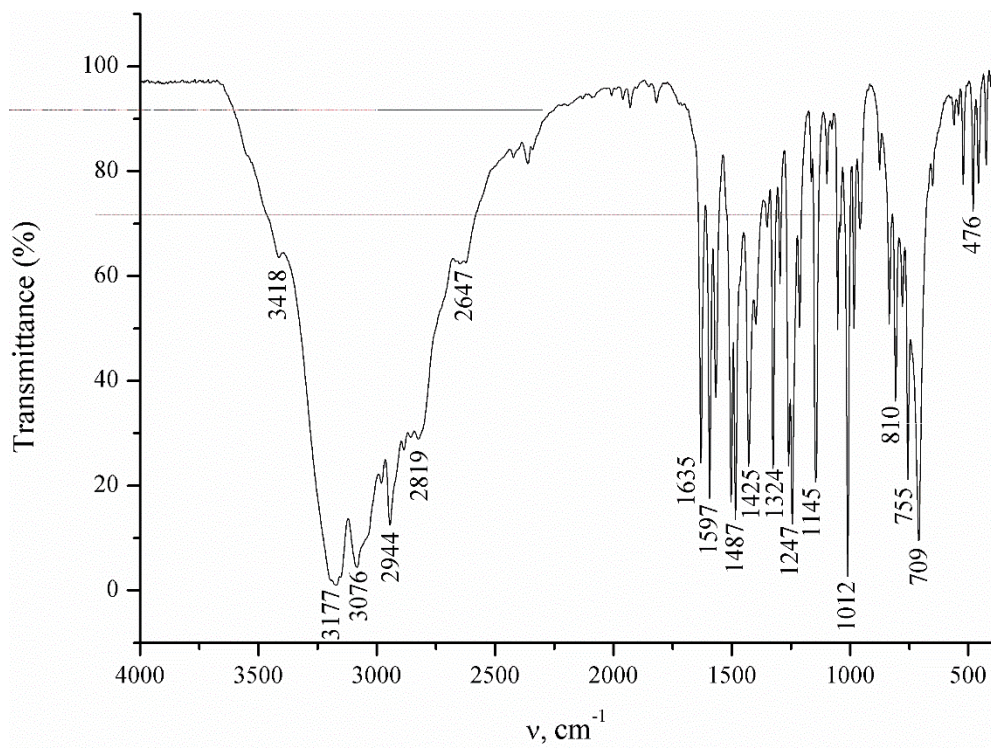

(a)

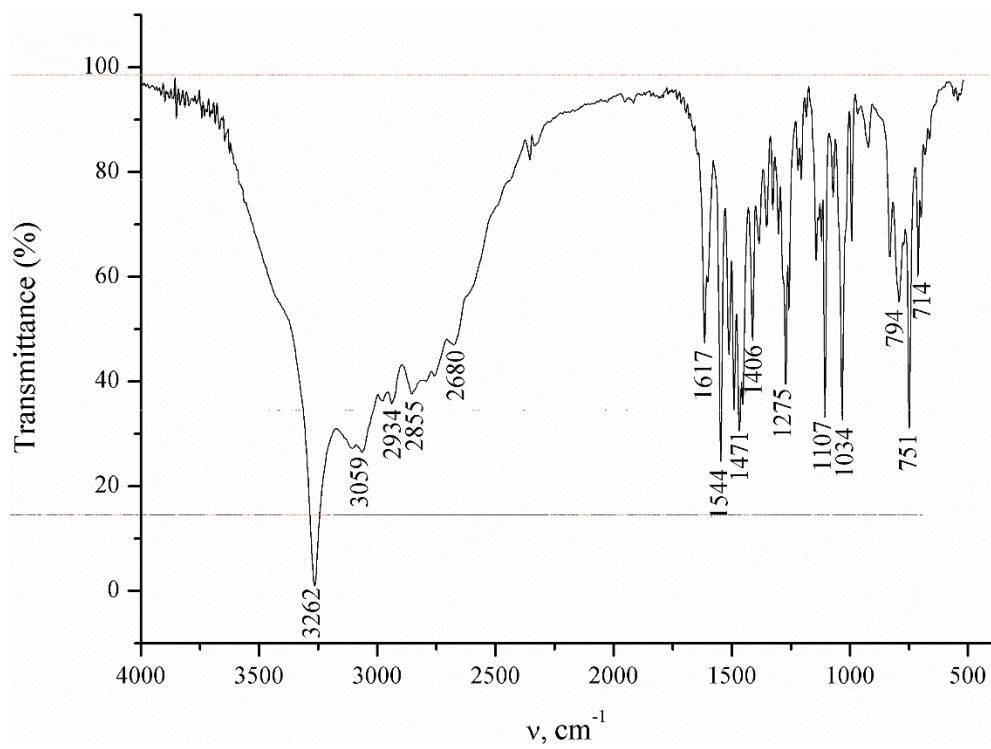

(b)

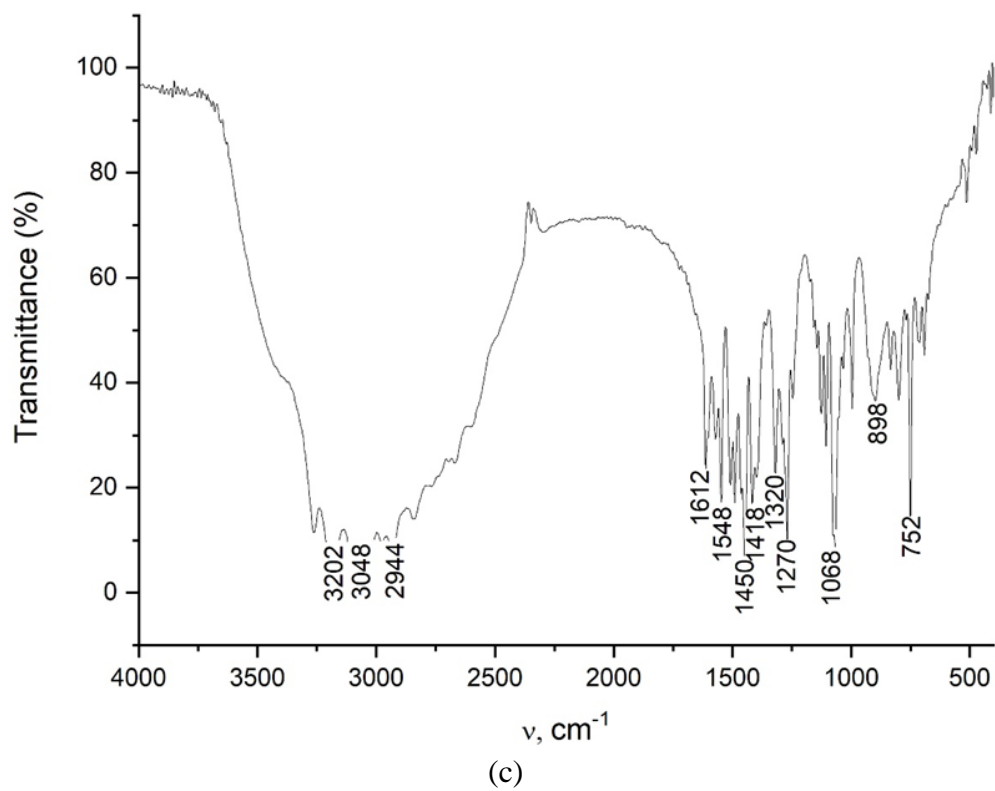

**Fig. S9.** IR spectra of  $\text{H}_2\text{L}^1$  (a),  $\text{H}_2\text{L}^2$  (b) and  $\text{H}_2\text{L}^3$  (c) in KBr.

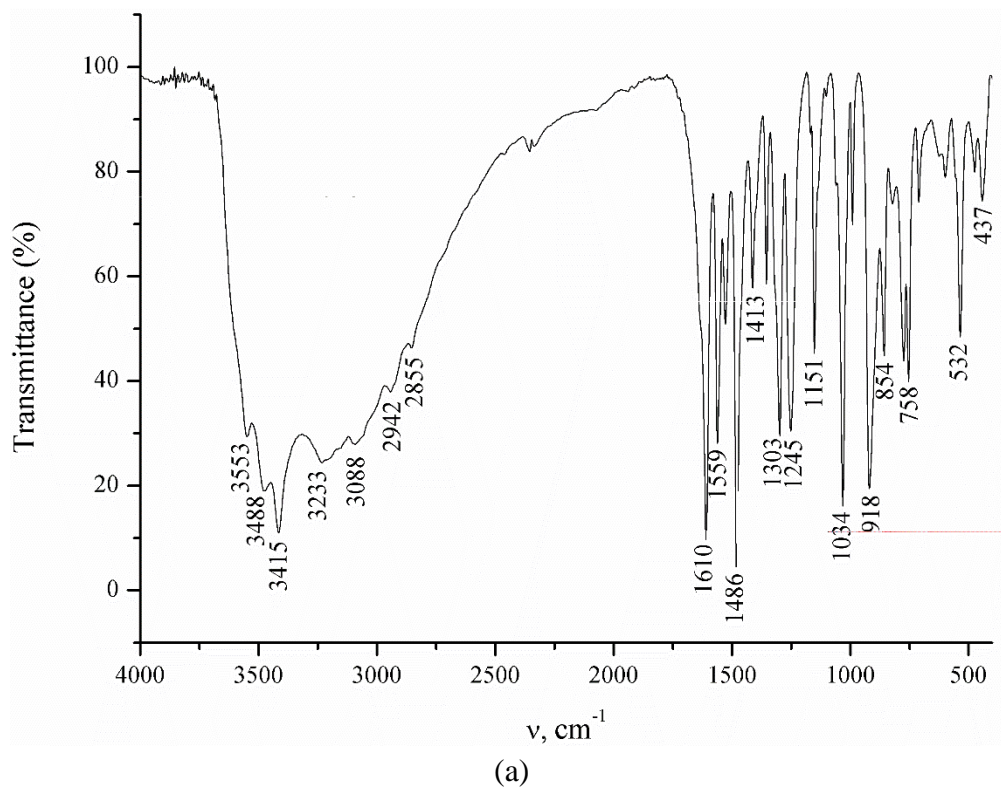

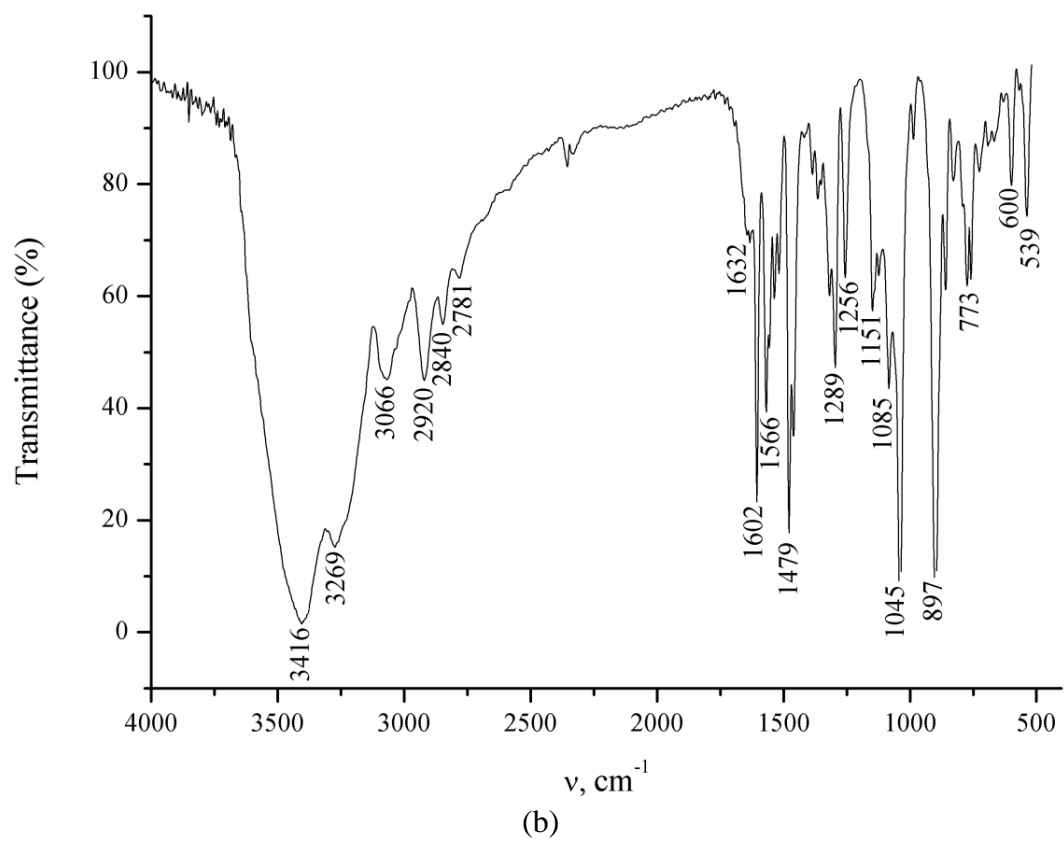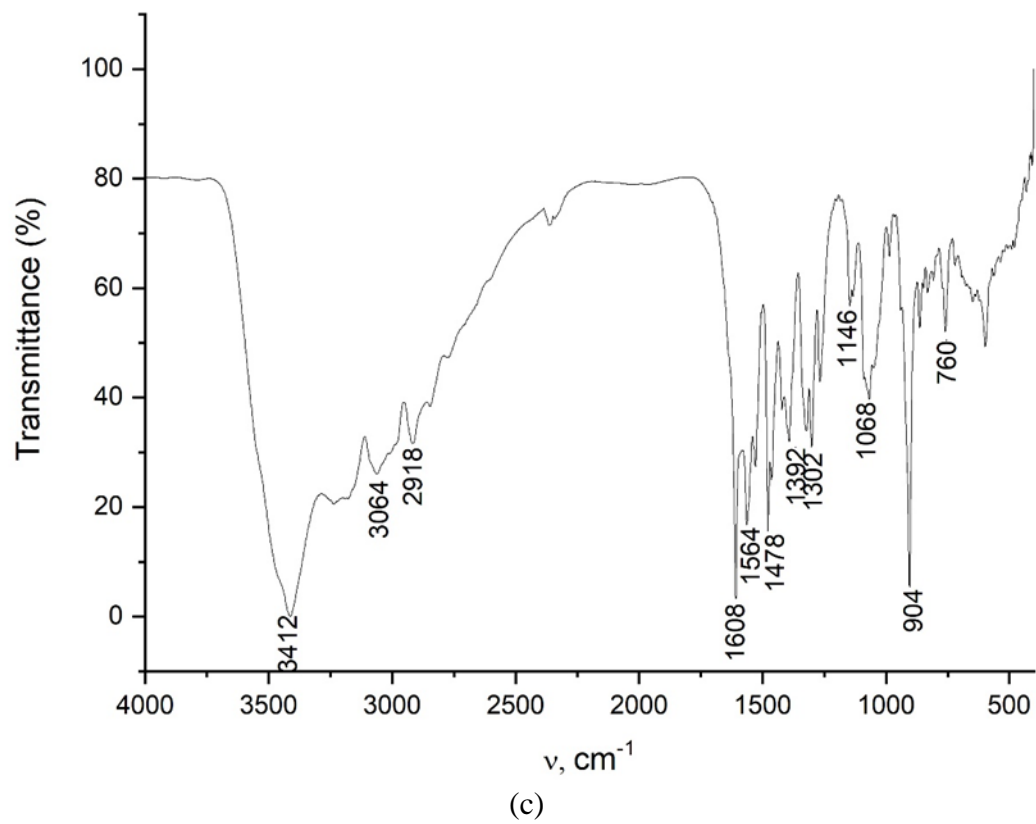

**Fig. S10.** IR spectra of **1** (a), [**2**-4DMF] (b) and **3** (c) in KBr.

**Table S3.** Selected geometric parameters (Å, °) for **1** and **2**<sup>a</sup>

| <b>1</b>               |             | <b>2, molecule A</b>      |            | <b>2, molecule B</b>      |           |
|------------------------|-------------|---------------------------|------------|---------------------------|-----------|
| U1–O1                  | 1.777(3)    | U1A–O1A                   | 1.770(6)   | U1B–O1B                   | 1.790(6)  |
| U1–O2                  | 1.789(2)    | U1A–O2A                   | 1.781(6)   | U1B–O2B                   | 1.783(5)  |
| U1–O3                  | 2.304(2)    | U1A–O3A                   | 2.237(6)   | U1B–O3B                   | 2.220(6)  |
| U1–O4                  | 2.404(2)    | U1A–O4A                   | 2.453(5)   | U1B–O4B                   | 2.440(6)  |
| U1–O4 <sup>1</sup>     | 2.381(2)    | U1A–O4A <sup>2</sup>      | 2.317(5)   | U1B–O4B <sup>3</sup>      | 2.333(6)  |
| U1–O5                  | 2.401(2)    | U1A–N1A                   | 2.563(6)   | U1B–N1B                   | 2.593(7)  |
| U1–N1                  | 2.463(3)    | U1A–N4A                   | 2.506(7)   | U1B–N4B                   | 2.493(7)  |
| U1–U1 <sup>1</sup>     | 3.97423(17) | U1A–U1A <sup>2</sup>      | 3.9569(7)  | U1B–U1B <sup>3</sup>      | 3.9378(7) |
|                        |             |                           |            |                           |           |
| O1–U1–O2               | 176.88(10)  | O1A–U1A–O2A               | 178.7(3)   | O1B–U1B–O3B               | 90.3(2)   |
| O1–U1–O3               | 91.39(10)   | O1A–U1A–O3A               | 91.4(3)    | O1B–U1B–O4B               | 94.3(2)   |
| O1–U1–O4               | 93.41(10)   | O1A–U1A–O4A <sup>2</sup>  | 88.8(2)    | O1B–U1B–O4B <sup>3</sup>  | 90.1(2)   |
| O1–U1–O4 <sup>1</sup>  | 90.52(10)   | O1A–U1A–O4A               | 95.3(2)    | O1B–U1B–N1B               | 90.8(2)   |
| O1–U1–O5               | 89.74(10)   | O1A–U1A–N1A               | 93.8(2)    | O1B–U1B–N4B               | 89.0(2)   |
| O1–U1–N1               | 89.72(11)   | O1A–U1A–N4A               | 88.8(3)    | O2B–U1B–O1B               | 177.0(3)  |
| O2–U1–O3               | 87.26(10)   | O2A–U1A–O3A               | 89.7(3)    | O2B–U1B–O3B               | 90.2(2)   |
| O2–U1–O4               | 89.56(10)   | O2A–U1A–O4A               | 84.1(2)    | O2B–U1B–O4B <sup>3</sup>  | 92.9(2)   |
| O2–U1–O4 <sup>1</sup>  | 89.72(10)   | O2A–U1A–O4A <sup>2</sup>  | 91.9(2)    | O2B–U1B–O4B               | 86.4(2)   |
| O2–U1–O5               | 87.23(10)   | O2A–U1A–N1A               | 85.8(2)    | O2B–U1B–N1B               | 86.5(2)   |
| O2–U1–N1               | 92.38(10)   | O2A–U1A–N4A               | 89.9(3)    | O2B–U1B–N4B               | 88.6(2)   |
| O3–U1–O4               | 133.48(8)   | O3A–U1A–O4A <sup>2</sup>  | 89.3(2)    | O3B–U1B–O4B <sup>3</sup>  | 87.8(2)   |
| O3–U1–O4 <sup>1</sup>  | 158.55(8)   | O3A–U1A–O4A               | 156.1(2)   | O3B–U1B–O4B               | 156.2(2)  |
| O3–U1–O5               | 77.61(8)    | O3A–U1A–N1A               | 72.2(2)    | O3B–U1B–N1B               | 70.4(2)   |
| O3–U1–N1               | 68.24(8)    | O3A–U1A–N4A               | 139.5(2)   | O3B–U1B–N4B               | 139.3(2)  |
| O4 <sup>1</sup> –U1–O4 | 67.67(9)    | O4A <sup>2</sup> –U1A–O4A | 67.9(2)    | O4B <sup>3</sup> –U1B–O4B | 68.8(2)   |
| O4 <sup>1</sup> –U1–O5 | 81.04(8)    | O4A–U1A–N1A               | 129.99(19) | O4B–U1B–N1B               | 132.7(2)  |
| O4–U1–N1               | 65.55(8)    | O4A <sup>2</sup> –U1A–N1A | 161.4(2)   | O4B <sup>3</sup> –U1B–N1B | 158.2(2)  |
| O4 <sup>1</sup> –U1–N1 | 133.14(8)   | O4A <sup>2</sup> –U1A–N4A | 131.1(2)   | O4B–U1B–N4B               | 64.3(2)   |
| O5–U1–O4               | 148.56(8)   | O4A–U1A–N4A               | 63.7(2)    | O4B <sup>3</sup> –U1B–N4B | 132.9(2)  |
| O5–U1–N1               | 145.82(8)   | N4A–U1A–N1A               | 67.4(2)    | N4B–U1B–N1B               | 68.9(2)   |

<sup>a</sup> Symmetry codes: <sup>i</sup>  $-x, -y+2, -z+2$  (**1**); <sup>i</sup>  $-x, -y+1, -z+3$ ; <sup>ii</sup>  $-x+1, -y+1, -z+4$  (**2**).

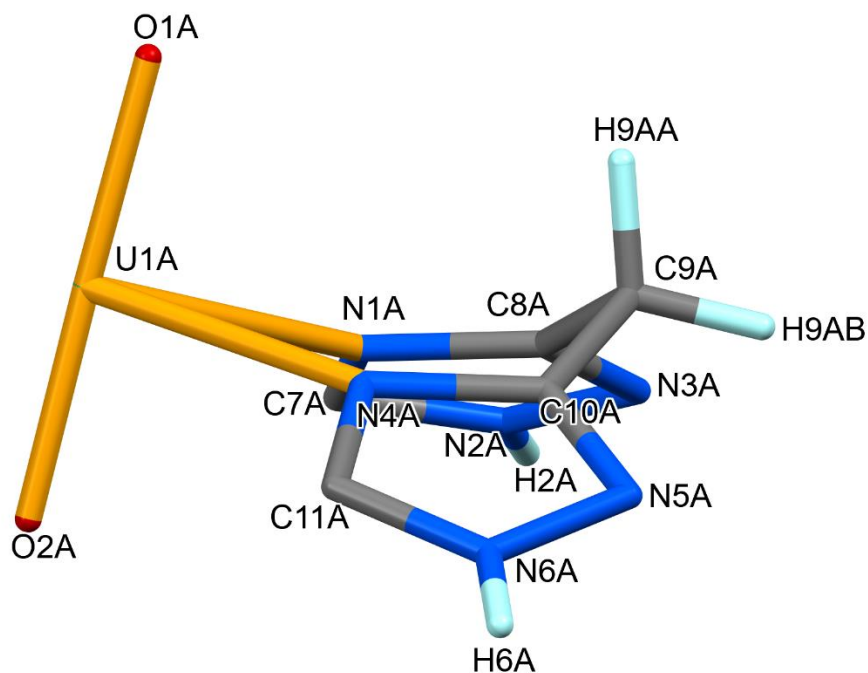

**Fig. S11.** Fragment of molecule **A** of complex **2** showing a boat conformation of the six-membered metallacycle.

**Table S4.** Selected geometric parameters (Å, °) for **3**

|          |            |          |            |
|----------|------------|----------|------------|
| U1–O1    | 1.772(3)   | U1–N1    | 2.558(3)   |
| U1–O2    | 1.774(3)   | U1–N4    | 2.588(3)   |
| U1–O3    | 2.230(3)   | U1–N7    | 2.559(4)   |
| U1–O5    | 2.331(3)   |          |            |
| O1–U1–O2 | 177.26(15) | O3–U1–O5 | 79.07(11)  |
| O1–U1–O3 | 88.24(13)  | O3–U1–N1 | 69.94(11)  |
| O1–U1–O5 | 94.86(13)  | O3–U1–N4 | 139.20(11) |
| O1–U1–N1 | 93.13(13)  | O3–U1–N7 | 151.48(12) |
| O1–U1–N4 | 93.81(13)  | O5–U1–N1 | 147.69(10) |
| O1–U1–N7 | 84.26(13)  | O5–U1–N4 | 140.99(10) |
| O2–U1–O3 | 94.34(13)  | O5–U1–N7 | 74.22(11)  |
| O2–U1–O5 | 86.55(13)  | N1–U1–N4 | 69.26(11)  |
| O2–U1–N1 | 86.90(13)  | N1–U1–N7 | 137.82(11) |
| O2–U1–N4 | 83.64(13)  | N7–U1–N4 | 68.93(11)  |
| O2–U1–N7 | 93.87(13)  |          |            |

**Table S5.** Hydrogen-bond geometry (Å, °) for 1–3

| <i>D</i> –H··· <i>A</i>      | <i>D</i> –H | HCA       | <i>D</i> ··· <i>A</i> | <i>D</i> –H··· <i>A</i> | Symmetry codes                    |
|------------------------------|-------------|-----------|-----------------------|-------------------------|-----------------------------------|
| <b>1</b>                     |             |           |                       |                         |                                   |
| O5–H···O3 <sup>1</sup>       | 0.854(9)    | 1.732(10) | 2.582(3)              | 173(2)                  | <sup>1</sup> $-x, -y, 1-z$        |
| O6–H···O2 <sup>2</sup>       | 0.82        | 2.05      | 2.833(4)              | 160.1                   | <sup>2</sup> $1-x, 1-y, 1-z$      |
| N2–H···O6                    | 0.86        | 1.89      | 2.732(4)              | 167.6                   | -                                 |
| C9–H···O5 <sup>3</sup>       | 0.97        | 2.53      | 3.037(4)              | 112.6                   | <sup>3</sup> $1-x, -y, 1-z$       |
| C11–H···O1 <sup>4</sup>      | 0.96        | 2.51      | 3.307(6)              | 140.0                   | <sup>4</sup> $+x, 1+y, +z$        |
| <b>2</b>                     |             |           |                       |                         |                                   |
| N2A–H2A···O3 <sup>1</sup>    | 0.88        | 1.83      | 2.694 (16)            | 167.7                   | <sup>1</sup> $x+1, y-1, z-1$      |
| N2A–H2A···O3X <sup>1</sup>   | 0.88        | 1.93      | 2.799 (17)            | 169.6                   | <sup>1</sup> $x+1, y-1, z-1$      |
| N6A–H6A···O4 <sup>2</sup>    | 0.88        | 1.78      | 2.626 (10)            | 161.3                   | <sup>2</sup> $-x+1, -y+1, -z+1$   |
| N2B–H2B···O1 <sup>3</sup>    | 0.88        | 1.93      | 2.770 (10)            | 160.4                   | <sup>3</sup> $-x+1, -y+2, -z+1$   |
| N5B–H5B···O2 <sup>2</sup>    | 0.88        | 1.86      | 2.708 (9)             | 160.4                   | <sup>2</sup> $-x+1, -y+1, -z+1$   |
| C1–H1···N4B                  | 0.95        | 2.64      | 3.447 (12)            | 142.8                   | -                                 |
| C3–H3C···O2B                 | 0.98        | 2.60      | 3.513 (12)            | 155.0                   | -                                 |
| C5–H5E···O1A <sup>2</sup>    | 0.98        | 2.59      | 3.283 (12)            | 127.4                   | <sup>2</sup> $-x+1, -y+1, -z+1$   |
| C7–H7···O2A <sup>4</sup>     | 0.95        | 2.64      | 3.55 (2)              | 161.5                   | <sup>4</sup> $x, y+1, z+1$        |
| C8–H8C···O2A <sup>2</sup>    | 0.98        | 2.47      | 3.45 (2)              | 177.1                   | <sup>2</sup> $-x+1, -y+1, -z+1$   |
| C12–H12E···O4B <sup>2</sup>  | 0.98        | 2.59      | 3.39 (4)              | 138.1                   | <sup>2</sup> $-x+1, -y+1, -z+1$   |
| C12–H12G···O1B <sup>2</sup>  | 0.98        | 2.63      | 3.44 (3)              | 140.7                   | <sup>2</sup> $-x+1, -y+1, -z+1$   |
| C9A–H9AA···O3A <sup>5</sup>  | 0.99        | 2.63      | 3.572 (11)            | 159.3                   | <sup>5</sup> $-x+2, -y+1, -z$     |
| C9B–H9BA···O1B <sup>2</sup>  | 0.99        | 2.40      | 3.382 (10)            | 171.8                   | <sup>2</sup> $-x+1, -y+1, -z+1$   |
| C12B–H12D···N5A <sup>6</sup> | 0.99        | 2.70      | 3.501 (12)            | 138.5                   | <sup>6</sup> $x-1, y, z$          |
| C7X–H7X···O2A <sup>4</sup>   | 0.95        | 2.41      | 3.30 (2)              | 155.7                   | <sup>4</sup> $x, y+1, z+1$        |
| C8X–H8XA···O2A <sup>2</sup>  | 0.98        | 2.65      | 3.26 (2)              | 120.5                   | <sup>2</sup> $-x+1, -y+1, -z+1$   |
| C9X–H9XB···O3X <sup>7</sup>  | 0.98        | 2.49      | 3.19 (3)              | 128.5                   | <sup>7</sup> $-x+1, -y+2, -z+2$   |
| C12X–H12H···O4B <sup>2</sup> | 0.98        | 2.44      | 3.41 (4)              | 168.0                   | <sup>2</sup> $-x+1, -y+1, -z+1$   |
| <b>3</b>                     |             |           |                       |                         |                                   |
| O1W–H···O4 <sup>1</sup>      | 0.86        | 2.19      | 2.865(5)              | 135.2                   | <sup>1</sup> $-1/2+x, 3/2-y, 1-z$ |
| O1W–H···O6                   | 0.85        | 1.87      | 2.699(5)              | 165.9                   | -                                 |
| O4–H···O6 <sup>2</sup>       | 0.82        | 1.90      | 2.705(5)              | 169.3                   | <sup>2</sup> $1-x, 1-y, 1-z$      |
| O7–H···O3                    | 0.82        | 2.10      | 2.884(5)              | 160.6                   | -                                 |
| N2–H···N5 <sup>3</sup>       | 0.86        | 2.15      | 2.984(5)              | 163.8                   | <sup>3</sup> $-1/2+x, +y, 1/2-z$  |
| N6–H···O1W <sup>4</sup>      | 0.86        | 1.88      | 2.685(6)              | 156.1                   | <sup>4</sup> $1+x, +y, +z$        |
| N9–H···O7 <sup>5</sup>       | 0.86        | 1.96      | 2.796(6)              | 164.7                   | <sup>5</sup> $1/2+x, 3/2-y, 1-z$  |
| C9–H···O2 <sup>6</sup>       | 0.97        | 2.43      | 3.399(5)              | 179.1                   | <sup>6</sup> $3/2-x, 1/2+y, +z$   |
| C12–H···O1 <sup>7</sup>      | 0.97        | 2.65      | 3.600(5)              | 166.2                   | <sup>7</sup> $3/2-x, -1/2+y, +z$  |

|                                 |      |      |          |       |                             |
|---------------------------------|------|------|----------|-------|-----------------------------|
| C12-H $\cdots$ N8 <sup>8</sup>  | 0.97 | 2.61 | 3.340(5) | 132.2 | <sup>8</sup> 2-x,1-y,1-z    |
| C15-H $\cdots$ O5               | 0.97 | 2.43 | 3.209(6) | 137.2 | -                           |
| C18-H $\cdots$ O1W <sup>9</sup> | 0.96 | 2.55 | 3.484(9) | 165.5 | <sup>9</sup> 1/2-x,1/2+y,+z |

<sup>a</sup> Symmetry codes: <sup>1</sup> -x+1, -y, -z+1; <sup>2</sup> -x+1, -y+1, -z; <sup>3</sup> -x, -y+1, -z+1.

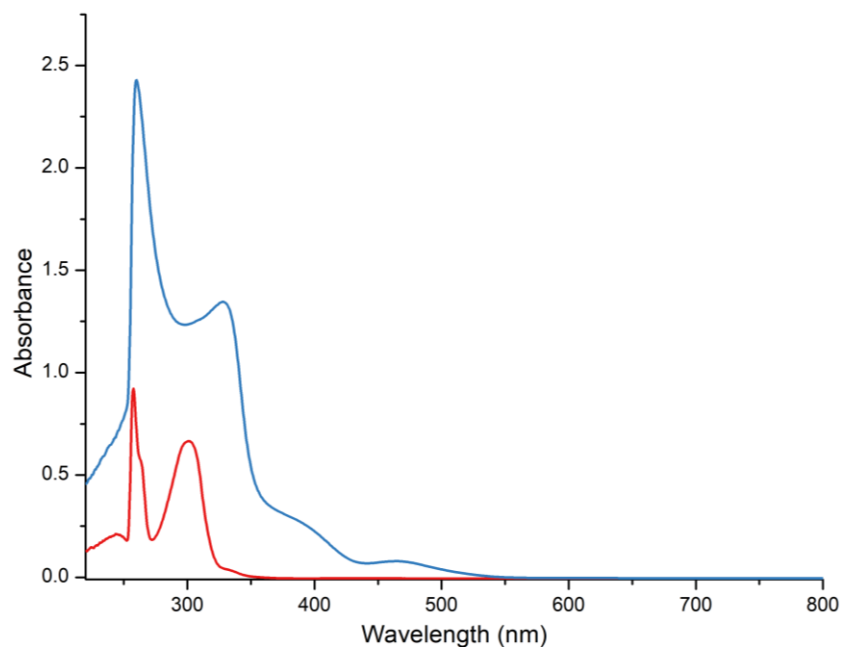

(a)

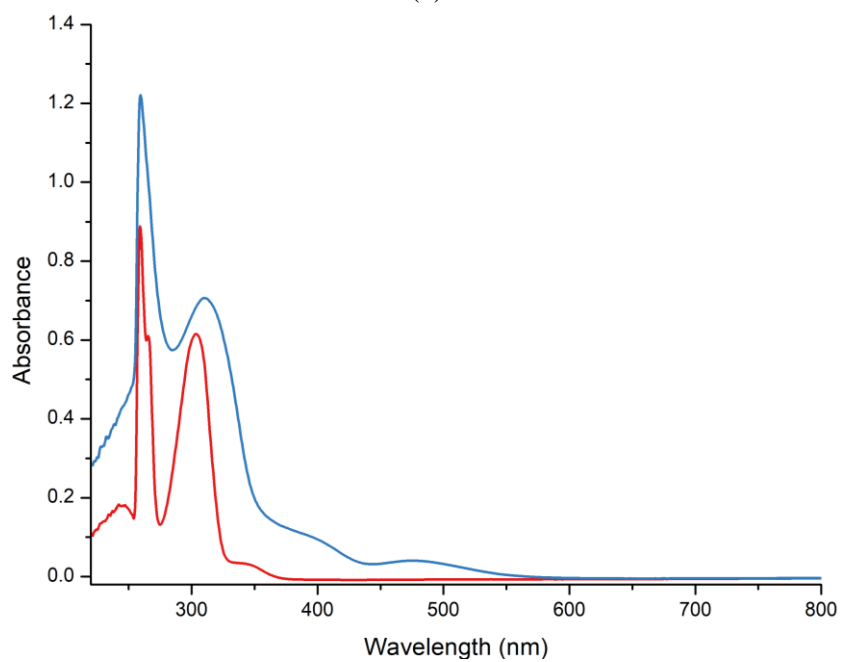

(b)

**Fig. S12.** Absorption spectra of (a) **H<sub>2</sub>L<sup>1</sup>** (red) and complex **1** (blue); (b) **H<sub>2</sub>L<sup>3</sup>** (red) and complex **3** (blue) in DMSO at r.t.  $C_{\text{Ligand}} = C_{\text{Complex}} = 5 \times 10^{-5}$  M.

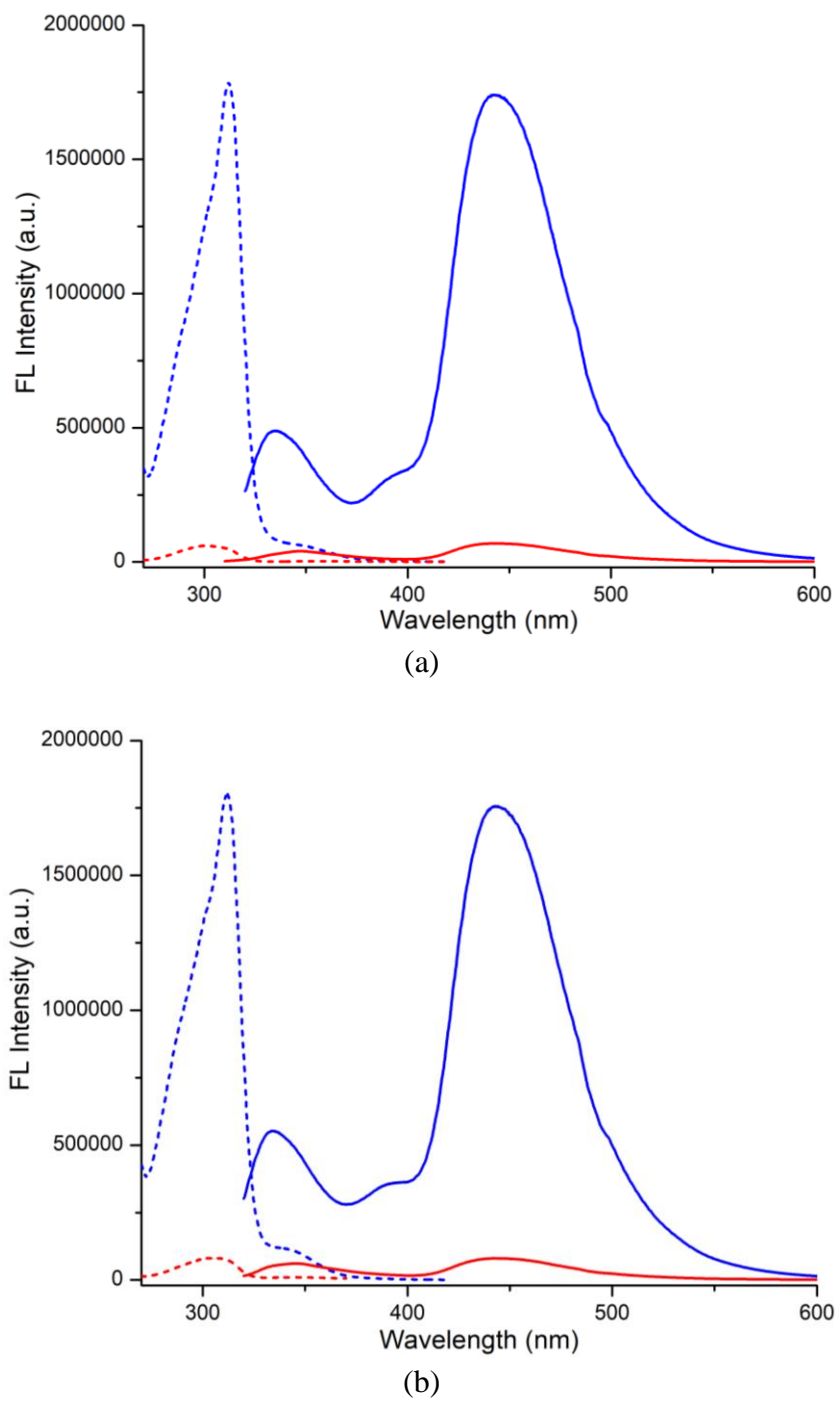

**Fig. S13.** Excitation (dotted) and emission spectra (solid) of ligands (blue) and their complexes (red) in DMSO at r.t.: (a)  $\mathbf{H}_2\mathbf{L}^2$  and [2-4DMF]; (b)  $\mathbf{H}_2\mathbf{L}^3$  and  $\mathbf{3}$ .  $C_{\text{Ligand}} = C_{\text{Complex}} = 1 \times 10^{-5}$  M.

**Listing S1.** Cartesian coordinates of the optimized molecular structures of **H<sub>2</sub>L<sup>1-3</sup>** and complexes **1-3** in DMSO medium (SMD continuum solvation model).

|                                  |           |           |           |                                        |           |           |           |
|----------------------------------|-----------|-----------|-----------|----------------------------------------|-----------|-----------|-----------|
| Complex [1-2CH <sub>3</sub> OH]: | N         | -4.500933 | 14.193577 | 1.883609                               |           |           |           |
| U                                | -1.082808 | 8.970621  | -0.587447 | N                                      | -3.321466 | 14.055015 | 1.212409  |
| U                                | -4.776343 | 9.758808  | 0.617199  | C                                      | 3.078059  | 6.428090  | -3.722745 |
| O                                | 0.554982  | 10.868402 | -0.253811 | H                                      | 3.085293  | 8.270103  | -2.618242 |
| O                                | 0.828627  | 8.048651  | -1.398670 | C                                      | 1.157706  | 5.026372  | -3.429258 |
| N                                | -1.404141 | 6.593052  | -1.230906 | H                                      | -1.131670 | 3.667686  | -2.323313 |
| O                                | -0.641331 | 8.466637  | 1.071324  | C                                      | -8.975631 | 12.351337 | 3.675456  |
| O                                | -1.478388 | 9.533848  | -2.237663 | H                                      | -8.965146 | 10.484969 | 2.613031  |
| O                                | -3.325274 | 8.065725  | -0.225504 | C                                      | -7.053434 | 13.749116 | 3.377238  |
| O                                | -2.533965 | 10.663365 | 0.258878  | H                                      | -4.749426 | 15.085814 | 2.285930  |
| O                                | -6.414825 | 7.859209  | 0.293046  | C                                      | 2.385748  | 5.251184  | -4.021039 |
| O                                | -6.691087 | 10.681689 | 1.421278  | H                                      | 4.041905  | 6.617191  | -4.180870 |
| N                                | -4.464106 | 12.145288 | 1.237389  | H                                      | 0.613283  | 4.120653  | -3.669116 |
| O                                | -5.216771 | 10.253134 | -1.044640 | C                                      | -8.289196 | 13.535850 | 3.956902  |
| O                                | -4.380485 | 9.205314  | 2.270665  | H                                      | -9.945739 | 12.171200 | 4.123881  |
| H                                | 1.208056  | 10.727232 | 0.446526  | H                                      | -6.513665 | 14.661114 | 3.603143  |
| C                                | 1.142729  | 11.676847 | -1.297490 | H                                      | 2.800894  | 4.526765  | -4.709182 |
| C                                | 1.296089  | 7.157552  | -2.235159 | H                                      | -8.715060 | 14.275128 | 4.622329  |
| C                                | -0.682684 | 5.703476  | -1.916543 |                                        |           |           |           |
| C                                | -2.518248 | 5.935694  | -0.826907 | Ligand H <sub>2</sub> L <sup>1</sup> : |           |           |           |
| C                                | -3.514750 | 6.683270  | -0.002144 | O                                      | -1.12842  | 12.88327  | 0.20960   |
| C                                | -2.343961 | 12.043961 | 0.024731  | O                                      | -6.19085  | 10.42101  | 2.64294   |
| H                                | -7.073349 | 8.006193  | -0.401012 | N                                      | -4.27926  | 12.00029  | 1.77114   |
| C                                | -7.001835 | 7.060587  | 1.344763  | C                                      | -1.92604  | 11.91928  | 0.88622   |
| C                                | -7.171796 | 11.591117 | 2.229800  | C                                      | -6.94527  | 11.52333  | 2.84026   |
| C                                | -5.192707 | 13.043641 | 1.904001  | C                                      | -5.14579  | 13.03493  | 2.00815   |
| C                                | -3.347725 | 12.798974 | 0.833471  | C                                      | -3.19265  | 12.58507  | 1.29460   |
| H                                | 0.363909  | 11.865106 | -2.031652 | H                                      | -1.42074  | 11.53656  | 1.77951   |
| H                                | 1.487588  | 12.623020 | -0.879960 | H                                      | -2.16255  | 11.06388  | 0.24480   |
| H                                | 1.972156  | 11.146978 | -1.766736 | C                                      | -8.23164  | 11.34573  | 3.35478   |
| C                                | 2.547811  | 7.359070  | -2.850551 | C                                      | -6.48549  | 12.82461  | 2.54858   |
| C                                | 0.597684  | 5.954335  | -2.541208 | N                                      | -4.63862  | 14.21680  | 1.69264   |
| N                                | -1.375630 | 4.554169  | -1.905751 | N                                      | -3.39987  | 13.90238  | 1.24520   |
| N                                | -2.549357 | 4.684974  | -1.222869 | C                                      | -9.05462  | 12.43556  | 3.58079   |
| H                                | -3.365333 | 6.433602  | 1.057109  | H                                      | -8.56703  | 10.33914  | 3.57152   |
| H                                | -4.526499 | 6.371979  | -0.271343 | C                                      | -7.33738  | 13.90990  | 2.78639   |
| H                                | -2.484463 | 12.284044 | -1.037962 | C                                      | -8.60995  | 13.72726  | 3.29695   |
| H                                | -1.334788 | 12.358574 | 0.299700  | H                                      | -10.04895 | 12.27856  | 3.98092   |
| H                                | -6.216121 | 6.858965  | 2.067978  | H                                      | -6.98115  | 14.90716  | 2.56261   |
| H                                | -7.368310 | 6.120474  | 0.932055  | H                                      | -9.25256  | 14.57991  | 3.47421   |
| H                                | -7.815634 | 7.604200  | 1.825466  | H                                      | -5.31473  | 10.70582  | 2.28163   |
| C                                | -8.431904 | 11.401714 | 2.832148  | H                                      | -0.22883  | 12.53879  | 0.14522   |
| C                                | -6.479796 | 12.802306 | 2.518206  | H                                      | -2.76707  | 14.61917  | 0.91941   |
| Complex [2-4DMF]:                | H         | 3.595401  | -0.136663 | 16.428358                              |           |           |           |

|   |           |           |           |                                            |           |           |           |
|---|-----------|-----------|-----------|--------------------------------------------|-----------|-----------|-----------|
| U | -0.842609 | 2.485800  | 20.739918 | H                                          | 7.031553  | -2.850310 | 20.720735 |
| U | 2.689751  | 0.684143  | 20.770643 | H                                          | 5.678771  | -0.840195 | 24.632994 |
| O | -1.734142 | 0.977197  | 20.372390 | H                                          | 5.544452  | 0.705103  | 23.804780 |
| O | -0.010409 | 4.039921  | 21.041875 | H                                          | 1.193447  | -0.312541 | 25.919455 |
| O | -2.076537 | 2.780101  | 22.594259 | H                                          | -2.441321 | 5.274455  | 26.311599 |
| O | 1.133959  | 1.838430  | 19.416003 | C                                          | -3.313577 | 6.194195  | 24.571534 |
| O | 0.693196  | 1.294048  | 22.078006 | H                                          | -4.065277 | 6.853530  | 22.691611 |
| N | -2.902194 | 3.980787  | 20.188195 | H                                          | 4.380512  | -2.173597 | 15.268303 |
| N | -0.922623 | 3.055868  | 18.271466 | H                                          | 6.036031  | -3.631633 | 18.924818 |
| O | 3.541404  | 2.219317  | 21.120612 | H                                          | -3.626626 | 7.090081  | 25.091341 |
| O | 1.897129  | -0.893715 | 20.485047 | C                                          | 5.080869  | -1.704813 | 19.052038 |
| O | 3.943574  | 0.390389  | 18.930321 | C                                          | 4.579204  | -2.045087 | 16.325805 |
| N | 4.786013  | -0.743543 | 21.363402 | C                                          | 5.516776  | -2.854514 | 18.377709 |
| N | 2.770775  | 0.152618  | 23.249972 | C                                          | 5.272471  | -3.032600 | 17.029189 |
| C | -2.468399 | 3.875694  | 23.207338 | H                                          | 5.608768  | -3.931562 | 16.529636 |
| C | 1.487509  | 2.567316  | 18.266374 | Ligand <b>H<sub>2</sub>L<sup>2</sup></b> : |           |           |           |
| C | 0.348061  | 0.565301  | 23.230070 | C                                          | -1.23372  | 10.78408  | 1.19908   |
| C | -3.473410 | 4.776265  | 21.106017 | O                                          | -5.91394  | 12.29912  | 4.95011   |
| C | -3.551988 | 4.269961  | 19.022626 | N                                          | -4.33146  | 12.04728  | 2.87096   |
| C | -1.842311 | 3.495239  | 17.371883 | C                                          | -1.95196  | 11.47465  | 2.31194   |
| C | 0.225063  | 3.016315  | 17.607791 | C                                          | -6.89987  | 12.65204  | 4.09790   |
| C | 4.365509  | -0.707339 | 18.341073 | C                                          | -5.41107  | 12.41521  | 2.11284   |
| C | 5.388647  | -1.535293 | 20.462827 | C                                          | -3.35929  | 11.85305  | 1.99192   |
| C | 5.442225  | -0.986331 | 22.536022 | H                                          | -1.40738  | 12.38630  | 2.58220   |
| C | 3.697709  | -0.242531 | 24.162444 | H                                          | -1.95219  | 10.83869  | 3.19602   |
| C | 1.617687  | 0.164023  | 23.905274 | C                                          | -8.15112  | 12.95370  | 4.64043   |
| C | -2.231418 | 4.037209  | 24.584217 | C                                          | -6.71057  | 12.72437  | 2.70174   |
| C | -3.158428 | 4.906680  | 22.519449 | N                                          | -5.14315  | 12.45177  | 0.81630   |
| H | 2.074162  | 1.960781  | 17.570010 | N                                          | -3.83998  | 12.09406  | 0.76906   |
| H | 2.092680  | 3.449443  | 18.516305 | C                                          | -9.20280  | 13.32224  | 3.81911   |
| H | -0.265731 | 1.159400  | 23.913491 | H                                          | -8.27722  | 12.89249  | 5.71423   |
| H | -0.225560 | -0.337743 | 22.980726 | C                                          | -7.79017  | 13.09917  | 1.89329   |
| N | -4.422410 | 5.487405  | 20.481576 | C                                          | -9.02695  | 13.39685  | 2.43704   |
| N | -4.482410 | 5.186737  | 19.164271 | H                                          | -10.16614 | 13.55268  | 4.25769   |
| C | -3.289163 | 3.613743  | 17.705749 | H                                          | -7.64140  | 13.15369  | 0.82256   |
| N | -1.319910 | 3.737136  | 16.189751 | H                                          | -9.84863  | 13.68504  | 1.79423   |
| N | -0.004935 | 3.420608  | 16.362326 | H                                          | -5.09705  | 12.11881  | 4.41997   |
| C | 4.135485  | -0.904711 | 16.967864 | H                                          | -3.32837  | 12.02280  | -0.10343  |
| N | 6.361079  | -2.199141 | 21.103042 | N                                          | -0.44586  | 9.74415   | 1.40071   |
| N | 6.405957  | -1.870971 | 22.414411 | N                                          | 0.00031   | 9.46536   | 0.15342   |
| C | 5.149849  | -0.316286 | 23.839557 | C                                          | -0.51552  | 10.31837  | -0.73695  |
| N | 3.174990  | -0.484380 | 25.344487 | N                                          | -1.30560  | 11.17430  | -0.10311  |
| N | 1.851505  | -0.214317 | 25.158126 | C                                          | -0.26026  | 10.29319  | -2.20885  |
| H | -1.710753 | 3.243883  | 25.105941 | O                                          | -1.46868  | 10.18759  | -2.95421  |
| C | -2.644623 | 5.174245  | 25.251897 | H                                          | 0.34772   | 9.42439   | -2.45985  |
| C | -3.564090 | 6.051906  | 23.219946 | H                                          | 0.29853   | 11.19108  | -2.49243  |
| H | -5.065387 | 6.157348  | 20.878285 | H                                          | -1.99649  | 10.97837  | -2.77592  |
| H | -3.803723 | 4.170126  | 16.925057 | H                                          | 0.63529   | 8.69531   | -0.00922  |
| H | -3.719505 | 2.606424  | 17.724451 | H                                          | 0.650672  | 3.508743  | 15.597672 |

|                                                  |          |          |          |                                        |          |          |          |
|--------------------------------------------------|----------|----------|----------|----------------------------------------|----------|----------|----------|
| Complex [3-CH <sub>3</sub> OH,H <sub>2</sub> O]: |          |          |          | H                                      | 6.96346  | 11.87159 | 22.17199 |
| U                                                | 8.02284  | 10.65977 | 27.77746 | H                                      | 7.47458  | 10.34229 | 33.41576 |
| O                                                | 6.19342  | 10.70560 | 26.47676 | H                                      | 4.94301  | 13.27261 | 22.11274 |
| O                                                | 6.58738  | 11.33672 | 29.39886 | H                                      | 8.12091  | 9.89751  | 22.19255 |
| N                                                | 9.47358  | 10.85300 | 29.98411 | Ligand H <sub>2</sub> L <sup>3</sup> : |          |          |          |
| N                                                | 10.60870 | 10.30356 | 27.36265 | C                                      | -6.00285 | 0.55857  | -0.57773 |
| N                                                | 8.54994  | 9.97101  | 25.30770 | C                                      | -5.11547 | -0.19250 | -1.34915 |
| O                                                | 8.37534  | 12.36459 | 27.37036 | C                                      | -3.75762 | -0.09972 | -1.10697 |
| O                                                | 7.80010  | 8.93386  | 28.19445 | C                                      | -3.25540 | 0.73547  | -0.10000 |
| C                                                | 5.89189  | 11.36062 | 25.38034 | C                                      | -4.16349 | 1.48707  | 0.67705  |
| C                                                | 6.04670  | 12.44353 | 29.83924 | C                                      | -5.53259 | 1.38980  | 0.42341  |
| C                                                | 10.67053 | 11.49720 | 30.11825 | O                                      | -3.76732 | 2.31366  | 1.66530  |
| C                                                | 9.18614  | 10.43972 | 31.21666 | C                                      | -1.82931 | 0.85244  | 0.15334  |
| C                                                | 11.25281 | 9.45688  | 26.50754 | N                                      | -0.83593 | 0.27519  | -0.54103 |
| C                                                | 11.58288 | 11.02662 | 27.90864 | N                                      | 0.37104  | 0.63494  | -0.04002 |
| C                                                | 9.51488  | 9.15424  | 24.79977 | C                                      | 0.05709  | 1.42469  | 0.96794  |
| C                                                | 7.85504  | 10.38384 | 24.23841 | N                                      | -1.28351 | 1.58847  | 1.12393  |
| C                                                | 4.73862  | 12.16356 | 25.31729 | C                                      | 1.08473  | 2.06545  | 1.84640  |
| C                                                | 6.69499  | 11.25328 | 24.21669 | C                                      | 0.70605  | 3.46072  | 2.21650  |
| O                                                | 4.89369  | 12.77088 | 29.59850 | N                                      | 0.32517  | 4.39341  | 1.30404  |
| C                                                | 6.94947  | 13.29225 | 30.70847 | C                                      | -0.00681 | 5.44265  | 2.04000  |
| N                                                | 11.12066 | 11.51326 | 31.35136 | N                                      | 0.19081  | 5.14924  | 3.33150  |
| C                                                | 11.41322 | 12.06908 | 28.95767 | N                                      | 0.64150  | 3.87921  | 3.46854  |
| N                                                | 10.15933 | 10.84072 | 32.03156 | C                                      | -0.68384 | 6.67488  | 1.55058  |
| C                                                | 8.01036  | 9.63779  | 31.67269 | C                                      | -2.13055 | 6.38699  | 1.27120  |
| N                                                | 12.55655 | 9.62421  | 26.49884 | N                                      | -2.94585 | 7.21075  | 0.56225  |
| C                                                | 10.53599 | 8.47515  | 25.64758 | C                                      | -4.10689 | 6.56570  | 0.54399  |
| N                                                | 12.74233 | 10.61966 | 27.39992 | N                                      | -3.97301 | 5.41174  | 1.21412  |
| N                                                | 9.46876  | 9.04298  | 23.49203 | N                                      | -2.71800 | 5.27787  | 1.68508  |
| N                                                | 8.41298  | 9.82311  | 23.15673 | C                                      | -5.38533 | 7.02960  | -0.07359 |
| H                                                | 4.12179  | 12.24066 | 26.20356 | O                                      | -6.06021 | 8.00424  | 0.72498  |
| C                                                | 4.40541  | 12.83909 | 24.15793 | H                                      | -7.06854 | 0.49402  | -0.75983 |
| C                                                | 6.33574  | 11.94347 | 23.05218 | H                                      | -5.48350 | -0.84407 | -2.13061 |
| H                                                | 7.83939  | 13.58436 | 30.14826 | H                                      | -3.07476 | -0.68668 | -1.70813 |
| H                                                | 6.42819  | 14.18431 | 31.05090 | H                                      | -6.21340 | 1.97572  | 1.02807  |
| H                                                | 7.28361  | 12.71497 | 31.57318 | H                                      | -0.88801 | -0.32573 | -1.35079 |
| H                                                | 10.86019 | 12.91300 | 28.53714 | H                                      | 2.04225  | 2.04725  | 1.32242  |
| H                                                | 12.38483 | 12.43223 | 29.28690 | H                                      | 1.20638  | 1.48488  | 2.76344  |
| H                                                | 10.23637 | 10.68272 | 33.02679 | H                                      | 0.01811  | 5.72776  | 4.14178  |
| O                                                | 7.95654  | 9.56974  | 33.09067 | H                                      | -0.20429 | 7.02320  | 0.63489  |
| H                                                | 8.11836  | 8.61593  | 31.30229 | H                                      | -0.59532 | 7.47553  | 2.28840  |
| H                                                | 7.10179  | 10.05208 | 31.23626 | H                                      | -4.64853 | 4.67219  | 1.35391  |
| H                                                | 11.25050 | 7.95781  | 25.01129 | H                                      | -6.02831 | 6.16693  | -0.27018 |
| H                                                | 10.04569 | 7.72932  | 26.27992 | H                                      | -5.16303 | 7.51569  | -1.02263 |
| H                                                | 13.66995 | 10.96342 | 27.61069 | H                                      | -6.39783 | 7.56321  | 1.51654  |
| H                                                | 3.51576  | 13.45775 | 24.13933 | H                                      | -2.77783 | 2.29879  | 1.71940  |
| C                                                | 5.20290  | 12.73552 | 23.01542 |                                        |          |          |          |
